# Supplementary material for: In situ metabolomics of aldosterone-producing adenomas
Source: JCI journal article supplement (doi:10.1172/jci.insight.130356), 2019-09-04
Supplement: sd1 [file 1]

## SUPPLEMENTAL DATA

**Supplemental Table 1**

|         | Overall         | Pairwise comparison          |                                  |                                    |
|---------|-----------------|------------------------------|----------------------------------|------------------------------------|
|         | <i>P</i> -value | <b>WT</b> vs<br><i>KCNJ5</i> | <i>KCNJ5</i> vs<br><i>ATP1A1</i> | <i>ATP1A1</i> vs<br><i>CACNA1D</i> |
| CYP11B1 | <b>0.002</b>    | <b>0.004</b>                 | 0.201                            | 1.000                              |
| CYP11B2 | <b>0.005</b>    | 1.000                        | <b>&lt;0.001</b>                 | <b>0.021</b>                       |
| CYP17A1 | 0.428           | NA                           | NA                               | NA                                 |
| HSD3B1  | 0.551           | NA                           | NA                               | NA                                 |
| HSD3B2  | 0.356           | NA                           | NA                               | NA                                 |

Relationships between staining intensities of steroidogenic enzymes and genotypes.

Staining intensities of three cores from each patient were classified into highest, median and lowest intensity. Median intensity of three cores from each patient were used for immunohistochemistry profiles of steroidogenic enzymes. *P*-values of less than 0.05 were considered significant. NA = not applicable. Enzymes with higher staining intensity were shown as bolds.

## Supplemental Table 2

Correlations between staining intensities of steroidogenic enzymes and intensities of 18-oxocortisol and 18-hydroxycortisol with regard to all genotypes and *KCNJ5* mutated APAs.

| All genotypes<br>(N=136) | CYP11B1       |                   | CYP11B2      |                 | CYP17A1       |                 | HSD3B1        |                   | HSD3B2 |                 |
|--------------------------|---------------|-------------------|--------------|-----------------|---------------|-----------------|---------------|-------------------|--------|-----------------|
|                          | $r_s$         | <i>P</i> -value   | $r_s$        | <i>P</i> -value | $r_s$         | <i>P</i> -value | $r_s$         | <i>P</i> -value   | $r_s$  | <i>P</i> -value |
| 18-oxocortisol           | <b>-0.345</b> | <b>&lt; 0.001</b> | 0.086        | 0.100           | <b>-0.171</b> | <b>0.002</b>    | -0.040        | 0.445             | 0.050  | 0.367           |
| 18-hydroxycortisol       | <b>-0.302</b> | <b>&lt; 0.001</b> | <b>0.107</b> | <b>0.039</b>    | <b>-0.165</b> | <b>0.002</b>    | <b>-0.202</b> | <b>&lt; 0.001</b> | -0.009 | 0.875           |

  

| <i>KCNJ5</i> mutated<br>APAs (N=49) | CYP11B1       |                   | CYP11B2 |                 | CYP17A1       |                   | HSD3B1 |                 | HSD3B2        |                 |
|-------------------------------------|---------------|-------------------|---------|-----------------|---------------|-------------------|--------|-----------------|---------------|-----------------|
|                                     | $r_s$         | <i>P</i> -value   | $r_s$   | <i>P</i> -value | $r_s$         | <i>P</i> -value   | $r_s$  | <i>P</i> -value | $r_s$         | <i>P</i> -value |
| 18-oxocortisol                      | <b>-0.421</b> | <b>&lt; 0.001</b> | 0.091   | 0.291           | <b>-0.293</b> | <b>&lt; 0.001</b> | 0.136  | 0.117           | -0.144        | 0.130           |
| 18-hydroxycortisol                  | <b>-0.367</b> | <b>&lt; 0.001</b> | -0.040  | 0.640           | <b>-0.345</b> | <b>&lt; 0.001</b> | -0.154 | 0.075           | <b>-0.247</b> | <b>0.009</b>    |

### Supplemental Table 3

Multiple regression analysis for correlations between steroidogenic enzymes and intensities of 18-oxocortisol or 18-hydroxycortisol.

Correlations between steroidogenic enzymes and intensities of 18-oxocortisol

|          | Unstandardized coefficients |       | Standardized coefficients |                   | t      | P-value          |
|----------|-----------------------------|-------|---------------------------|-------------------|--------|------------------|
|          | B                           | SE    | Beta                      | 95% CI            |        |                  |
| Constant | 0.082                       | 0.044 |                           | (-0.004 - 0.168)  | 1.873  | 0.062            |
| CYP11B1  | -0.699                      | 0.163 | -0.253                    | (-1.019 - -0.378) | -4.282 | <b>&lt;0.001</b> |
| CYP17A1  | 0.148                       | 0.068 | 0.128                     | (0.014 - 0.281)   | 2.171  | <b>0.031</b>     |

Correlations between steroidogenic enzymes and intensities of 18-hydroxycortisol

|          | Unstandardized coefficients |       | Standardized coefficients |                   | t      | P-value      |
|----------|-----------------------------|-------|---------------------------|-------------------|--------|--------------|
|          | B                           | SE    | Beta                      | 95% CI            |        |              |
| Constant | 0.521                       | 0.207 |                           | (0.115 - 0.928)   | 2.523  | 0.012        |
| CYP11B1  | -1.034                      | 0.504 | -0.144                    | (-2.026 - -0.043) | -2.052 | <b>0.041</b> |
| CYP11B2  | 0.036                       | 0.071 | 0.032                     | (-0.104 - 0.176)  | 0.504  | 0.615        |
| CYP17A1  | 0.079                       | 0.190 | 0.026                     | (-0.295 - 0.452)  | 0.414  | 0.679        |
| HSD3B1   | -0.608                      | 0.370 | -0.100                    | (-1.337 - 0.121)  | -1.642 | 0.102        |

#### Supplemental Table 4

Correlations between staining intensities of steroidogenic enzymes and intensities of 18-oxocortisol with regard to tissues with lower (low CYP17A1) and higher (high CYP17A1) than median value of staining intensities of CYP17A1.

|         | 18-oxocortisol           |                   |                           |                   |
|---------|--------------------------|-------------------|---------------------------|-------------------|
|         | Tissues with low CYP17A1 |                   | Tissues with high CYP17A1 |                   |
|         | $r_s$                    | $P$ -value        | $r_s$                     | $P$ -value        |
| CYP11B1 | <b>-0.277</b>            | <b>&lt; 0.001</b> | <b>-0.306</b>             | <b>&lt; 0.001</b> |
| CYP11B2 | -0.140                   | 0.073             | 0.104                     | 0.184             |
| CYP17A1 | <b>0.213</b>             | <b>0.005</b>      | <b>-0.226</b>             | <b>0.003</b>      |
| HSD3B1  | 0.032                    | 0.686             | -0.048                    | 0.542             |
| HSD3B2  | -0.111                   | 0.182             | 0.057                     | 0.503             |

Abbreviations SE, standard error; CI, confidence interval.  $P$ -values of less than 0.05 were considered significant and shown as bolds.

## Supplemental Table 5

Relationships between staining intensities of steroidogenic enzymes and clinical outcome.

|         | Overall          | Pairwise comparison    |                       |                         |                                       |                                       |                       |
|---------|------------------|------------------------|-----------------------|-------------------------|---------------------------------------|---------------------------------------|-----------------------|
|         | <i>P</i> -value  | Complete<br>vs partial | Complete<br>vs absent | Partial<br>vs<br>absent | Complete<br>vs partial<br>plus absent | Complete<br>plus partial<br>vs absent | Complete<br>vs absent |
| CYP11B1 | <b>&lt;0.001</b> | <b>0.006</b>           | <b>&lt;0.001</b>      | 0.088                   | <b>&lt;0.001</b>                      | <b>0.002</b>                          | <b>&lt;0.001</b>      |
| CYP11B2 | 0.449            | NA                     | NA                    | NA                      | 0.713                                 | 0.207                                 | 0.324                 |
| CYP17A1 | 0.775            | NA                     | NA                    | NA                      | 0.549                                 | 0.846                                 | 0.915                 |
| HSD3B1  | 0.643            | NA                     | NA                    | NA                      | 0.365                                 | 0.627                                 | 0.368                 |
| HSD3B2  | <b>0.037</b>     | 1.000                  | 0.220                 | <b>0.043</b>            | 0.791                                 | <b>0.012</b>                          | 0.074                 |

Staining intensities of three cores from each patient were classified into highest, median and lowest intensity. Median intensity of three cores from each patient were used for immunohistochemistry profiles of steroidogenic enzymes. *P*-values of less than 0.05 were considered significant and shown as bolds. NA = not applicable

**Supplemental Table 6**

Multivariate logistic regression analyses for clinical success including metabolic profiles.

**Complete vs partial plus absent**

|                                                               | Odds ratio (95% CI) |        |          | P-value      |
|---------------------------------------------------------------|---------------------|--------|----------|--------------|
| Age at adrenalectomy (per year)                               | 0.93                | ( 0.88 | - 0.98 ) | <b>0.010</b> |
| BMI (per 1 kg/m <sup>2</sup> )                                | 0.83                | ( 0.72 | - 0.95 ) | <b>0.009</b> |
| m/z 384.1505 (per 0.01 unit of peak intensity)                | 1.03                | ( 1.01 | - 1.06 ) | <b>0.005</b> |
|                                                               | Odds ratio (95% CI) |        |          | P-value      |
| Age at adrenalectomy (per year)                               | 0.94                | ( 0.89 | - 1.00 ) | <b>0.035</b> |
| BMI (per 1 kg/m <sup>2</sup> )                                | 0.83                | ( 0.72 | - 0.95 ) | <b>0.009</b> |
| m/z 128.386 (per 0.01 unit of peak intensity)                 | 1.07                | ( 1.02 | - 1.12 ) | <b>0.010</b> |
|                                                               | Odds ratio (95% CI) |        |          | P-value      |
| Age at adrenalectomy (per year)                               | 0.93                | ( 0.88 | - 0.99 ) | <b>0.017</b> |
| BMI (per 1 kg/m <sup>2</sup> )                                | 0.81                | ( 0.70 | - 0.93 ) | <b>0.004</b> |
| m/z 933.5345 (per 0.01 unit of peak intensity)                | 1.15                | ( 1.03 | - 1.27 ) | <b>0.011</b> |
|                                                               | Odds ratio (95% CI) |        |          | P-value      |
| Age at adrenalectomy (per year)                               | 0.91                | ( 0.85 | - 0.98 ) | <b>0.007</b> |
| BMI (per 1 kg/m <sup>2</sup> )                                | 0.80                | ( 0.68 | - 0.93 ) | <b>0.003</b> |
| Acetohexamide (m/z 345.088) (per 0.01 unit of peak intensity) | 0.94                | ( 0.89 | - 0.99 ) | <b>0.012</b> |
|                                                               | Odds ratio (95% CI) |        |          | P-value      |
| Age at adrenalectomy (per year)                               | 0.90                | ( 0.85 | - 0.97 ) | <b>0.003</b> |
| BMI (per 1 kg/m <sup>2</sup> )                                | 0.80                | ( 0.69 | - 0.94 ) | <b>0.005</b> |
| m/z 266.0705 (per 0.01 unit of peak intensity)                | 0.67                | ( 0.48 | - 0.93 ) | <b>0.015</b> |
|                                                               | Odds ratio (95% CI) |        |          | P-value      |
| Age at adrenalectomy (per year)                               | 0.93                | ( 0.88 | - 0.99 ) | <b>0.018</b> |
| BMI (per 1 kg/m <sup>2</sup> )                                | 0.82                | ( 0.71 | - 0.95 ) | <b>0.006</b> |
| m/z 308.875 (per 0.01 unit of peak intensity)                 | 1.01                | ( 1.00 | - 1.01 ) | <b>0.018</b> |

|                                               | Odds ratio (95% CI) |   |      |          | <i>P</i> -value |
|-----------------------------------------------|---------------------|---|------|----------|-----------------|
| Age at adrenalectomy (per year)               | 0.93                | ( | 0.88 | - 0.99 ) | <b>0.018</b>    |
| BMI (per 1 kg/m <sup>2</sup> )                | 0.82                | ( | 0.71 | - 0.95 ) | <b>0.006</b>    |
| m/z 306.876 (per 0.01 unit of peak intensity) | 1.01                | ( | 1.00 | - 1.01 ) | <b>0.019</b>    |

|                                                      | Odds ratio (95% CI) |   |      |          | <i>P</i> -value |
|------------------------------------------------------|---------------------|---|------|----------|-----------------|
| Age at adrenalectomy (per year)                      | 0.93                | ( | 0.88 | - 0.99 ) | <b>0.017</b>    |
| BMI (per 1 kg/m <sup>2</sup> )                       | 0.83                | ( | 0.72 | - 0.96 ) | <b>0.011</b>    |
| CDP (m/z 384.0005) (per 0.01 unit of peak intensity) | 1.23                | ( | 1.02 | - 1.49 ) | <b>0.030</b>    |

|                                                | Odds ratio (95% CI) |   |      |          | <i>P</i> -value |
|------------------------------------------------|---------------------|---|------|----------|-----------------|
| Age at adrenalectomy (per year)                | 0.95                | ( | 0.89 | - 1.00 ) | 0.059           |
| BMI (per 1 kg/m <sup>2</sup> )                 | 0.79                | ( | 0.68 | - 0.92 ) | <b>0.003</b>    |
| m/z 425.2573 (per 0.01 unit of peak intensity) | 1.21                | ( | 1.01 | - 1.45 ) | <b>0.038</b>    |

|                                               | Odds ratio (95% CI) |   |      |          | <i>P</i> -value |
|-----------------------------------------------|---------------------|---|------|----------|-----------------|
| Age at adrenalectomy (per year)               | 0.93                | ( | 0.87 | - 0.99 ) | <b>0.018</b>    |
| BMI (per 1 kg/m <sup>2</sup> )                | 0.81                | ( | 0.71 | - 0.94 ) | <b>0.004</b>    |
| m/z 640.525 (per 0.01 unit of peak intensity) | 1.07                | ( | 1.00 | - 1.15 ) | <b>0.041</b>    |

*P*-values of less than 0.05 were considered significant and shown as bolds.

## Supplemental Figure 1

### Workflow of the project

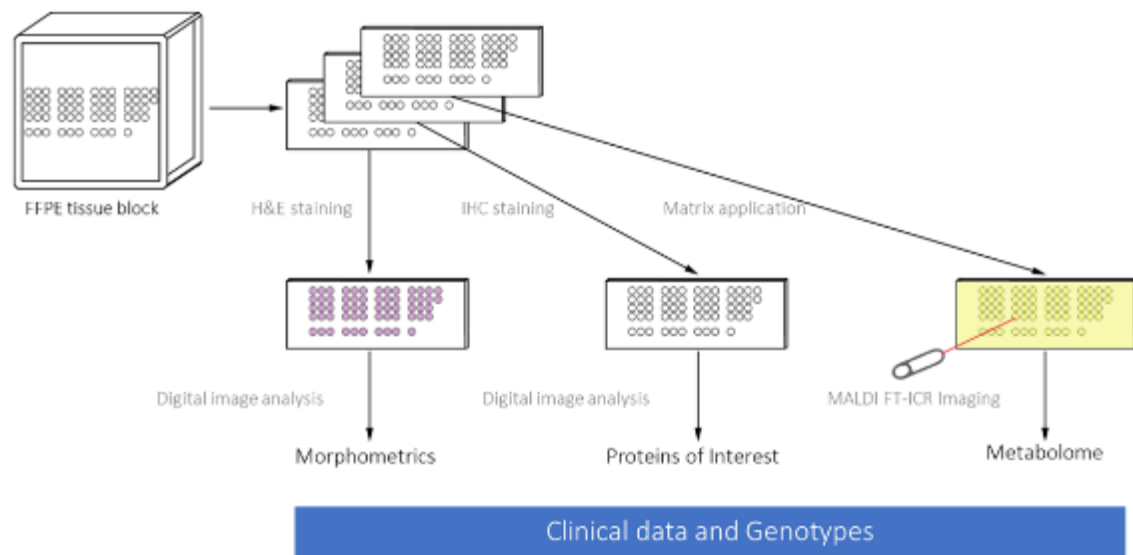

## Supplemental Figure 2

A

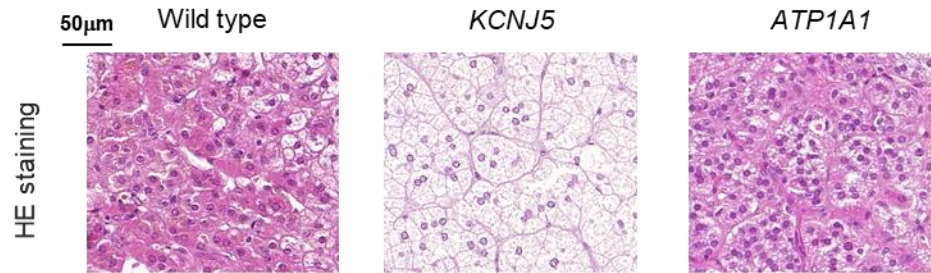

B

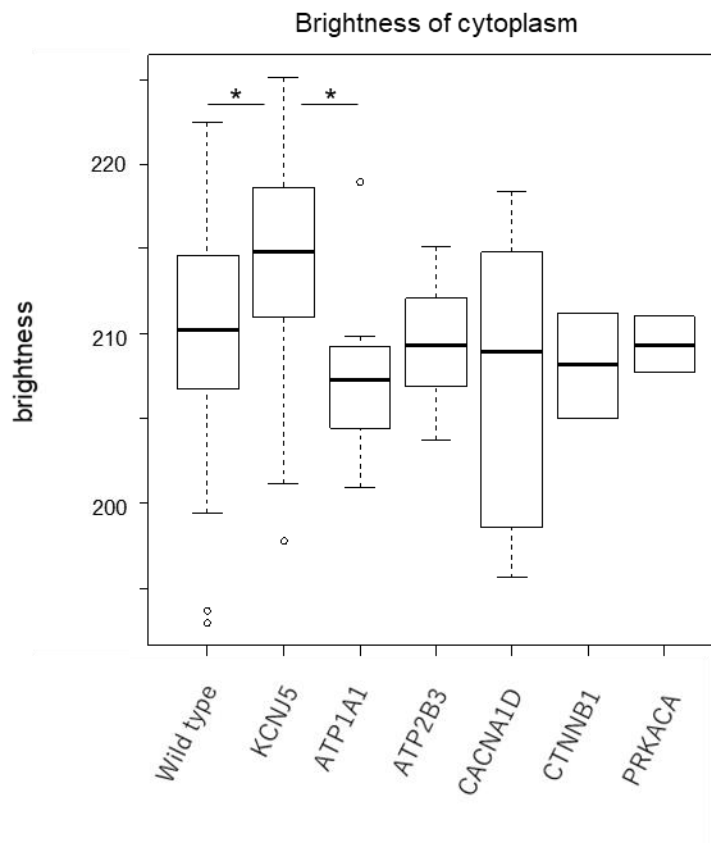

Comparison of morphometric feature and genotypes of 124 APA samples. (A) Representative images of HE staining of Wild type, *KCNJ5* mutated and *ATP1A1* mutated APAs. (B) Brightness of cytoplasm with regard to genotypes (adjusted  $P = 0.022$ ). Kruskal-Wallis test was used for statistical analysis.  $*P < 0.05$ .

### Supplemental Figure 3

A.

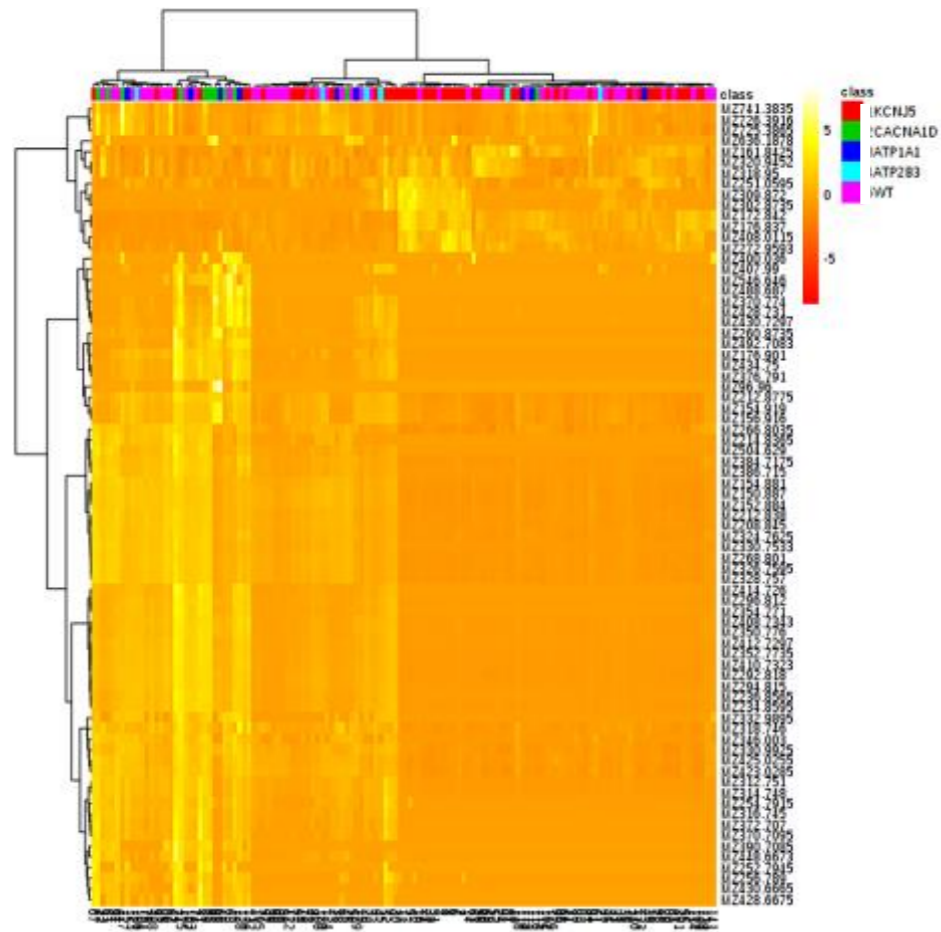

B.

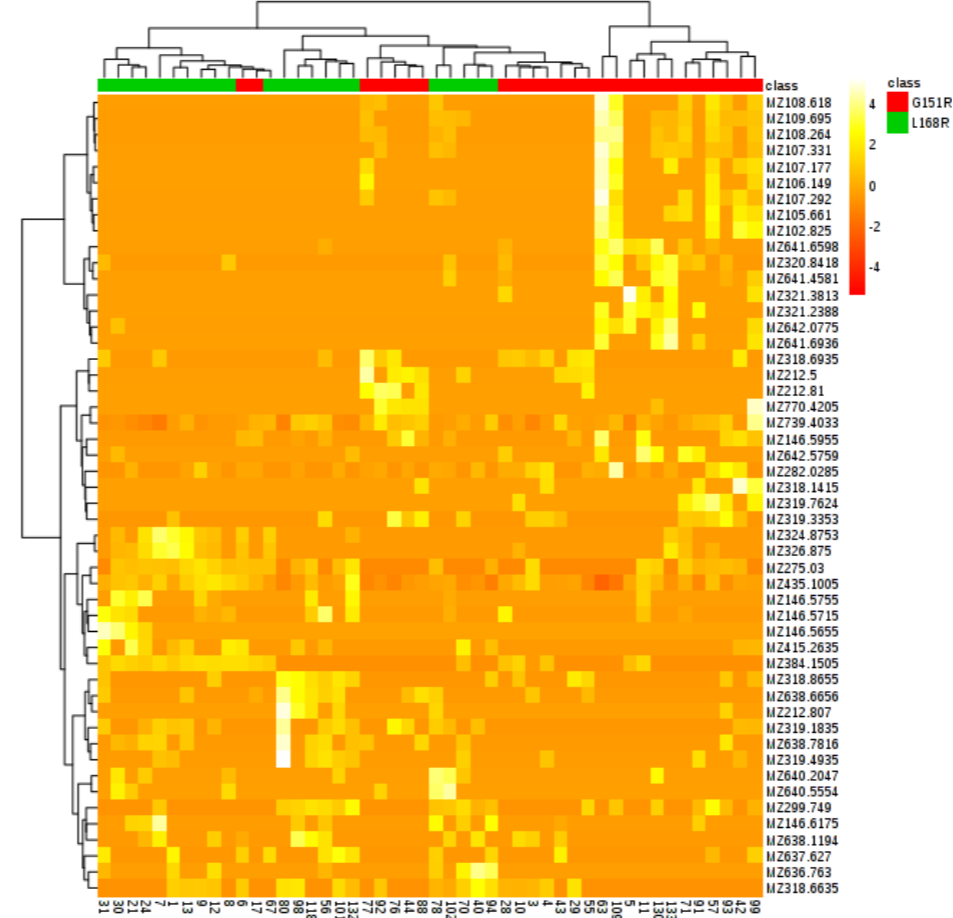

C.

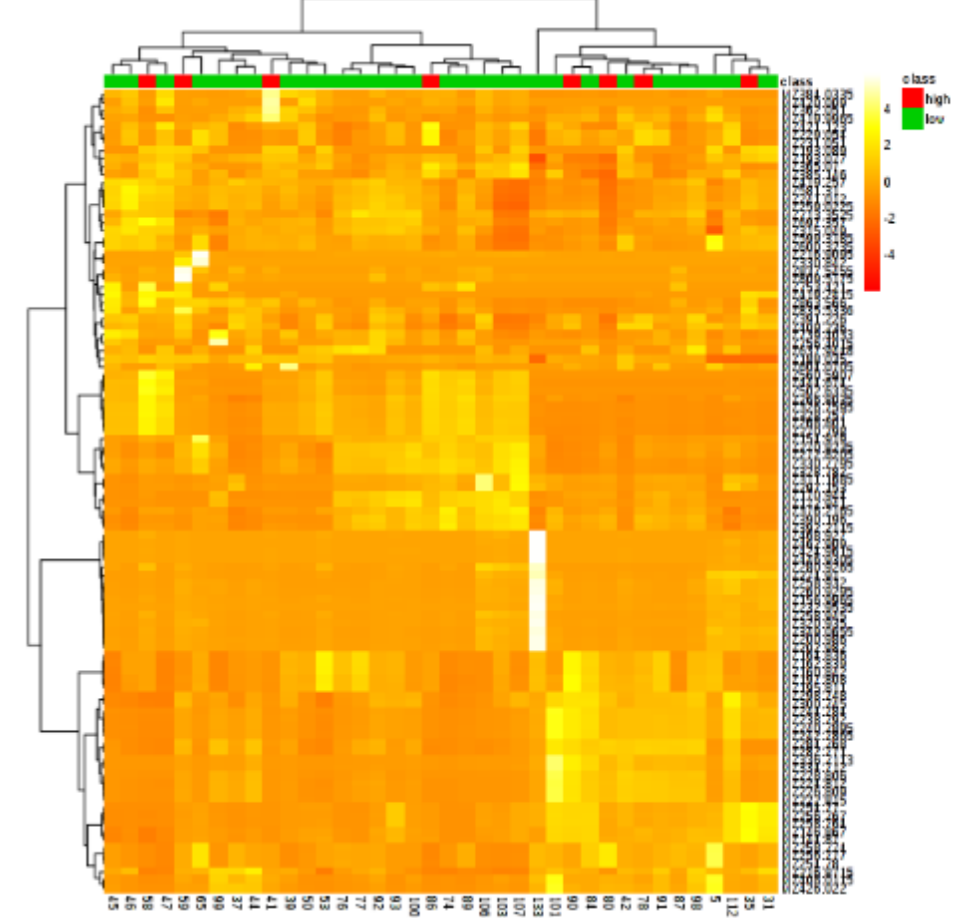

Unguided hierarchical clustering analysis of metabolome profiles among 128 APAs with wildtype, *KCNJ5*, *ATP1A1*, *ATP2B3* and *CACNA1D* mutations (A), those for 48 APAs with *KCNJ5* mutation between G151R and L168R and (B), and those for 38 APAs between high ( $>1.8 \mu\text{g/dL}$ ) and low ( $\leq 1.8 \mu\text{g/dL}$ ) for cortisol after 1mg DST (C).

#### Supplemental Figure 4

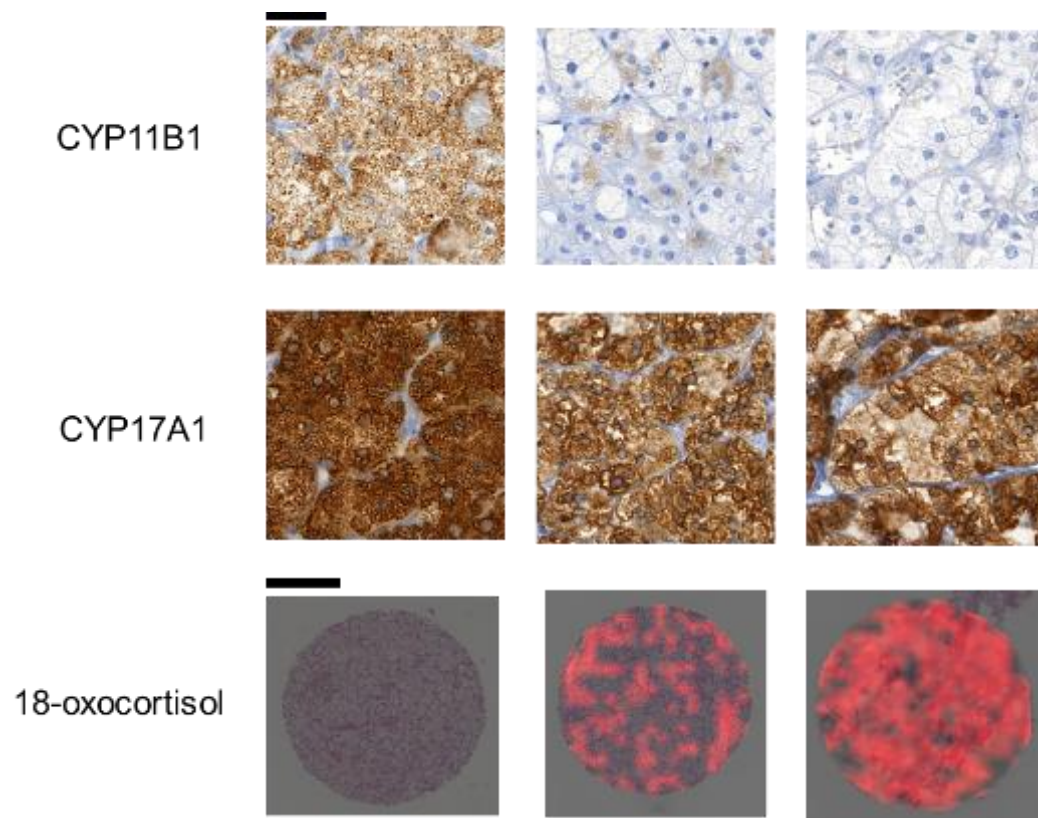

Comparison of immunohistochemistry of CYP11B1 and CYP17A1 and 18-oxocortisol expression (red) in cores with lower than median expression of CYP17A1. Scale bars for metabolites and IHC; 500 and 50  $\mu\text{m}$ , respectively.
